# Supplementary material
Source: publisher figshare collection journal article supplement (https://sage.figshare.com/ndownloader/files/34022700)
Supplement: Supplementary file 1 [file 34022700]

**Appendix 2 – Data extraction forms with bibliographical information of the included studies (n=61)**

You can access the information using this link: <https://drive.google.com/drive/folders/1ihbLgXnWpqjB7XozRy3fSCaCQI9YCCp3?usp=sharing>
